# Supplementary material for: Facile synthesis of nanocrystalline-assembled bundle-like CuO nanostructure with high rate capacities and enhanced cycling stability as an anode material for lithium-ion batteries
Source: Royal Society of Chemistry journal article supplement (doi:10.1039/c2jm31023f), 2012-01-01
Supplement: c2jm31023f.pdf [file c2jm31023f.pdf]

## Electronic Supplementary Information

### Facile Synthesis of Nanocrystalline-Assembled Bundle-like CuO Nanostructure with High Rate Capacities and Enhanced Cycling Stability as an Anode Material for Lithium-ion Batteries

Linlin Wang,<sup>a</sup> Wei Cheng,<sup>a</sup> Huaxu Gong,<sup>a</sup> Caihua Wang,<sup>a</sup> Dake Wang,<sup>a</sup> Kaibin Tang<sup>\*a</sup>  
and Yitai Qian<sup>a,b</sup>

Division of Nanomaterials and Chemistry Hefei National Laboratory for Physical  
Sciences at the Microscale. Department of Chemistry, University of Science and  
Technology of China, Hefei 230026, P.R. China. E-mail: kbtang@ustc.edu.cn. Phone:  
86-551-3601791.

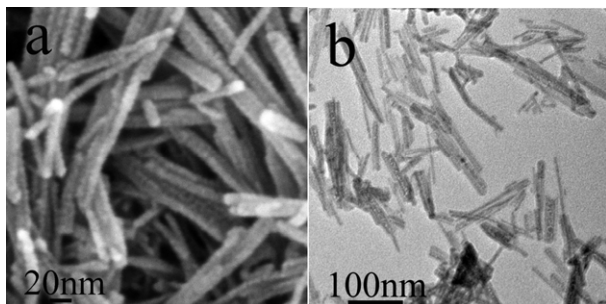

**Fig. S1.** SEM and TEM images of the precursor synthesized without  $C_6H_8O_7 \cdot H_2O$ : (a) SEM image; (b) TEM image.

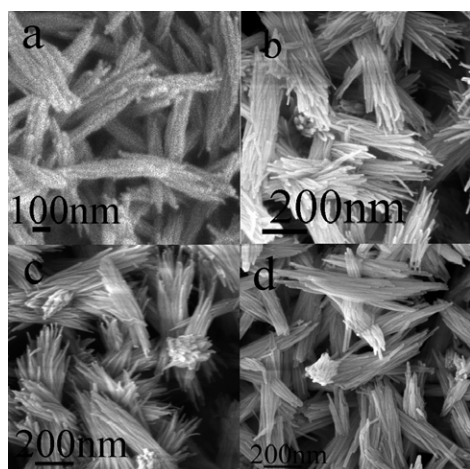

Fig. S2. SEM images of bundle-like  $\text{Cu}(\text{OH})_2$  obtained with different amounts of NaOH:

(a) 5.0 mmol; (b) 9.0 mmol; (c) 12.5 mmol; (d) 50.0 mmol.

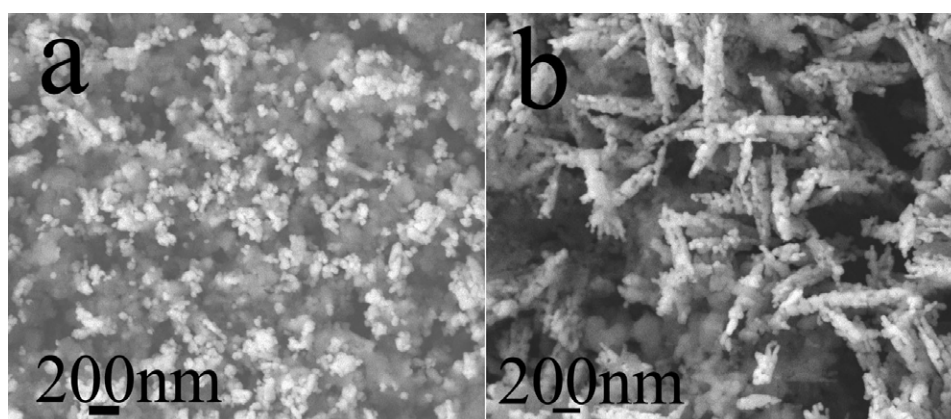

Fig. S3. The SEM image of the both electrodes: (a) after grinding; (b) without grinding.

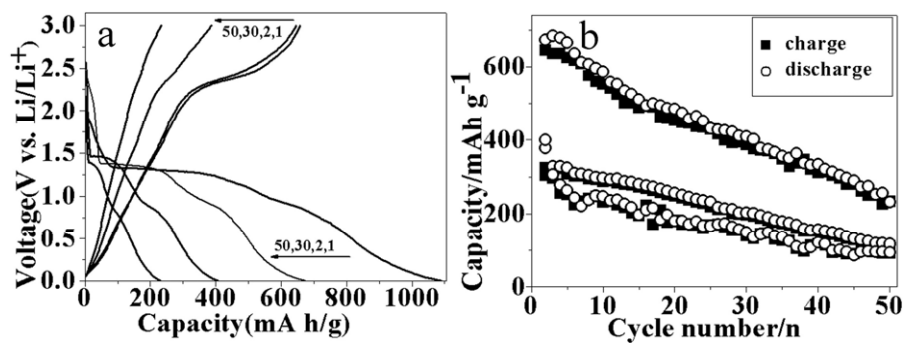

**Fig. S4.** (a) Selected discharge/charge profiles for the bundle-like CuO at a current rate at 0.3 C; (b) Cycling performances of CuO electrode at current rate at 0.3 C, 1 C and 2 C, respectively. (From the 2nd cycle to the 50th cycle).

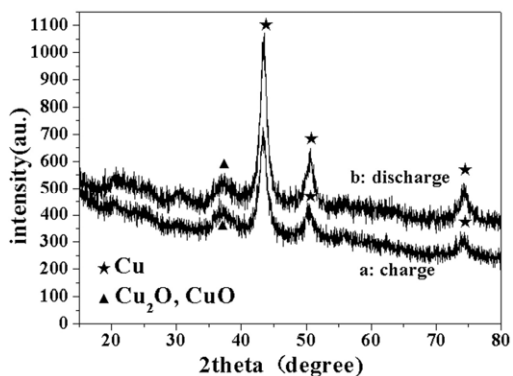

**Fig. S5.** The XRD patterns for the CuO electrodes with structure destruction after discharge to 0.001 V and charged to 3.0 V: (a) Charge (14th cycle); (b) Discharge (15th cycle).

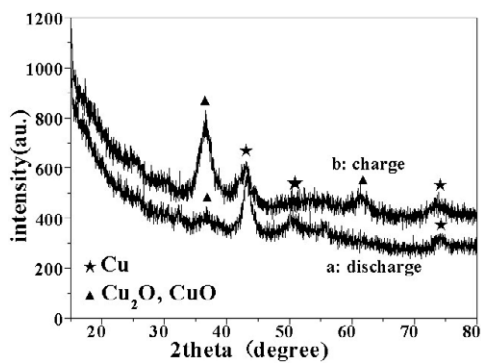

**Fig. S6.** The XRD patterns for the CuO electrodes with bundle-like structure after discharge to 0.001 V and charged to 3.0 V: (a) Discharge (41th cycle); (b) Charge (24 th cycle).

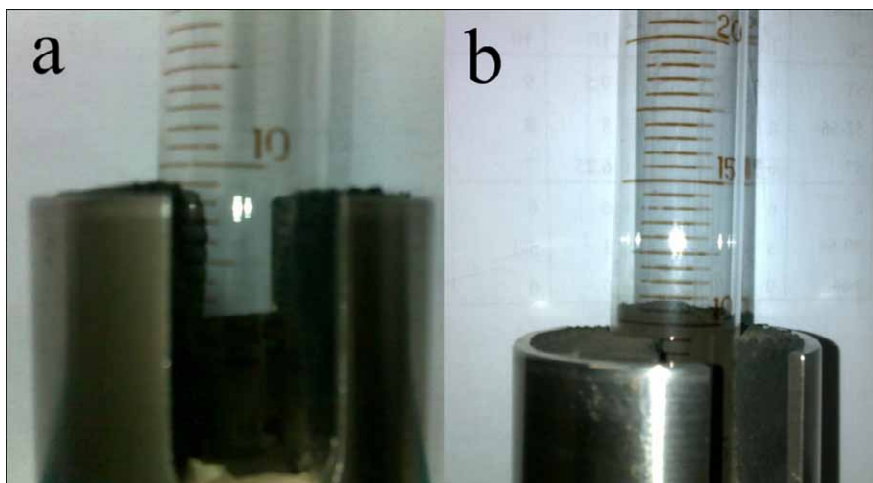

**Fig. S7.** (a) CuO nanoparticles obtained from grinding the bundle-like CuO (disassembled) : $V \sim 6$  mL,  $m = 6.310$  g,  $\rho = 1.05$  g  $\text{cc}^{-1}$ ; (b) the bundle-like CuO(assembled) : $V \sim 10.5$  mL,  $m = 6.324$  g,  $\rho = 0.602$  g  $\text{cc}^{-1}$ .
